# Supplementary material for: Death and readmissions after hospital discharge during the December holiday period: cohort study
Source: PubMed Central journal article supplement — BMJ. 2018 Dec 10;363:k4481. doi: 10.1136/bmj.k4481 (PMC6287120; doi:10.1136/bmj.k4481), 2018-12-10

Appendix Table 1. Holiday and control period start and end dates. These dates always correspond to the last Friday working to last Friday of vacation period. All date ranges are inclusive. Holiday periods will be compared to control periods beginning 4 weeks prior and 4 weeks following the first day of the holiday period (period B).

| <b>Fiscal Year (April-March)</b> | <b>Period A</b> | <b>Period B (December Holiday period)</b> | <b>Period C</b> |
|----------------------------------|-----------------|-------------------------------------------|-----------------|
| 2002                             | Nov 22-Dec 6    | Dec 20-Jan 3                              | Jan 17-31       |
| 2003                             | Nov 21-Dec 5    | Dec 19-Jan 2                              | Jan 16-30       |
| 2004                             | Nov 19-Dec 3    | Dec 17-Dec 31                             | Jan 14-28       |
| 2005                             | Nov 25-Dec 9    | Dec 23- Jan 6                             | Jan 20-Feb 3    |
| 2006                             | Nov 24-Dec 8    | Dec 22-Jan 5                              | Jan 19-Feb 2    |
| 2007                             | Nov 23-Dec 7    | Dec 21-Jan 4                              | Jan 18-Feb 1    |
| 2008                             | Nov 21-Dec 5    | Dec 19-Jan 2                              | Jan 16-30       |
| 2009                             | Nov 20-Dec 4    | Dec 18-Jan 1                              | Jan 15-29       |
| 2010                             | Nov 19-Dec 3    | Dec 17-Dec 31                             | Jan 14-28       |
| 2011                             | Nov 25-Dec 9    | Dec 23-Jan 6                              | Jan 20-Feb 3    |
| 2012                             | Nov 23-Dec 7    | Dec 21-Jan 4                              | Jan 18-Feb 1    |
| 2013                             | Nov 22-Dec 6    | Dec 20-Jan 3                              | Jan 17-31       |
| 2014                             | Nov 21-Dec 5    | Dec 19-Jan 2                              | Jan 16-30       |
| 2015                             | Nov 20-Dec 4    | Dec 18-Jan 1                              | Jan 15-29       |

Appendix Table 2. Definition of Outpatient Follow-Up

| Term                                          | Details                                                                                                                                                                                                                                                                                                                                                                                                                                                                                                                                                         |
|-----------------------------------------------|-----------------------------------------------------------------------------------------------------------------------------------------------------------------------------------------------------------------------------------------------------------------------------------------------------------------------------------------------------------------------------------------------------------------------------------------------------------------------------------------------------------------------------------------------------------------|
| Outpatient physician follow-up                | A billing code in the Ontario Health Insurance Plan database (Setting: office or home (location in 'O','H')), exclude codes starting with: X, J, L, H, E, Q. E, G310, G313, G538, G590, G373, G489, or any laboratory test. This definition includes visits to walk-in clinics, however would exclude visits to emergency departments. This definition does not include non-physician providers such as nurse practitioners. As physician assistants require supervision by physicians, visits with physician assistants would be captured as physician visits. |
| Ontario Health Insurance Plan (OHIP) database | Contains all physician billing claims for insured physician services in Ontario.                                                                                                                                                                                                                                                                                                                                                                                                                                                                                |

Appendix Table 3. Methods Used for Propensity Score-Matched Survival Analysis

|                               |                                                                                                                                                                                                                                                    |
|-------------------------------|----------------------------------------------------------------------------------------------------------------------------------------------------------------------------------------------------------------------------------------------------|
| Creation of propensity scores | Derived from a logistic regression model to predict discharge during holiday or control periods. All baseline covariates were predictors in this model (including year of discharge, and additionally the top 10 most common admission diagnoses). |
| Matching                      | Matching 1:1 on the logit of the propensity score within a caliper distance of 0.2*Standard Deviation of the logit of the propensity score. <sup>1</sup>                                                                                           |
| Comparison of matched pairs   | Using standardized differences between the matched groups, for all variables included in the propensity score model, to confirm <10% difference between groups. <sup>2</sup>                                                                       |
| Analysis                      | Cox proportional hazards modelling for the primary outcome (30-day death or readmission), with robust standard errors to account for the paired nature of the data. <sup>3</sup> Report hazard ratios and 95% confidence intervals.                |

1. Austin PC. Optimal caliper widths for propensity-score matching when estimating differences in means and differences in proportions in observational studies. *Pharm Stat.* 2011 Mar; 10(2): 150–161.

2. Austin PC. Balance diagnostics for comparing the distribution of baseline covariates between treatment groups in propensity-score matched samples. *Stat Med.* 2009 Nov 10;28(25):3083-107.

3. Austin PC. The use of propensity score methods with survival or time-to-event outcomes: reporting measures of effect similar to those used in randomized experiments. *Stat Med.* 2014 Mar 30; 33(7): 1242–1258.

Appendix Table 4. Secondary outcomes unadjusted odds ratios stratified by baseline patient and hospital characteristics.

| Patient Group                                           | 7-day death or readmission, OR (95% CI) | 14-day death or readmission, OR (95% CI) | 7-day outpatient follow-up, OR (95% CI) | 14-day outpatient follow-up, OR (95% CI) |
|---------------------------------------------------------|-----------------------------------------|------------------------------------------|-----------------------------------------|------------------------------------------|
| Year of discharge                                       |                                         |                                          |                                         |                                          |
| 2002-2008                                               | 1.16 (1.14-1.19)                        | 1.13 (1.11-1.15)                         | 0.63 (0.62-0.64)                        | 0.69 (0.68-0.70)                         |
| 2009-2016                                               | 1.12 (1.10-1.15)                        | 1.11 (1.09-1.13)                         | 0.62 (0.61-0.63)                        | 0.65 (0.64-0.66)                         |
| Patient age                                             |                                         |                                          |                                         |                                          |
| <18 years                                               | 1.16 (1.11-1.22)                        | 1.12 (1.08-1.16)                         | 0.69 (0.67-0.71)                        | 0.75 (0.73-0.77)                         |
| 18-64 years                                             | 1.17 (1.14-1.19)                        | 1.15 (1.13-1.17)                         | 0.62 (0.61-0.63)                        | 0.67 (0.66-0.68)                         |
| 65 years+                                               | 1.12 (1.09-1.14)                        | 1.09 (1.07-1.11)                         | 0.60 (0.59-0.61)                        | 0.64 (0.63-0.65)                         |
| Sex female                                              | 1.15(1.12-1.17)                         | 1.13 (1.11-1.15)                         | 0.62 (0.62-0.63)                        | 0.67 (0.66-0.68)                         |
| Sex male                                                | 1.14 (1.12-1.17)                        | 1.11 (1.09-1.13)                         | 0.62 (0.61-0.63)                        | 0.67 (0.66-0.68)                         |
| Rural                                                   | 1.20 (1.16-1.25)                        | 1.19 (1.16-1.23)                         | 0.63 (0.61-0.65)                        | 0.67 (0.65-0.68)                         |
| Not rural                                               | 1.13 (1.11-1.15)                        | 1.11 (1.09-1.12)                         | 0.62 (0.61-0.63)                        | 0.67 (0.66-0.68)                         |
| Income quintile                                         |                                         |                                          |                                         |                                          |
| 1                                                       | 1.14 (1.10-1.17)                        | 1.12 (1.09-1.15)                         | 0.62 (0.61-0.64)                        | 0.67 (0.66-0.69)                         |
| 2                                                       | 1.13 (1.10-1.17)                        | 1.08 (1.05-1.11)                         | 0.63 (0.61-0.64)                        | 0.67 (0.65-0.68)                         |
| 3                                                       | 1.16 (1.12-1.20)                        | 1.14 (1.11-1.18)                         | 0.62 (0.61-0.64)                        | 0.67 (0.65-0.68)                         |
| 4                                                       | 1.13 (1.09-1.18)                        | 1.11 (1.07-1.14)                         | 0.62 (0.61-0.64)                        | 0.68 (0.66-0.69)                         |
| 5                                                       | 1.17 (1.12-1.21)                        | 1.16 (1.12-1.19)                         | 0.62 (0.60-0.63)                        | 0.67 (0.65-0.68)                         |
| Length of hospital stay                                 |                                         |                                          |                                         |                                          |
| 0-3 days                                                | 1.14 (1.12-1.16)                        | 1.13 (1.11-1.15)                         | 0.63 (0.62-0.64)                        | 0.68 (0.67-0.69)                         |
| >3 days                                                 | 1.14 (1.11-1.16)                        | 1.11 (1.08-1.13)                         | 0.62 (0.61-0.63)                        | 0.66 (0.65-0.67)                         |
| Arrival by ambulance at index admission                 | 1.10 (1.07-1.13)                        | 1.08 (1.06-1.11)                         | 0.61 (0.60-0.62)                        | 0.66 (0.65-0.68)                         |
| Not arriving by ambulance                               | 1.16 (1.14-1.19)                        | 1.14 (1.12-1.15)                         | 0.63 (0.62-0.64)                        | 0.67 (0.67-0.68)                         |
| Charlson comorbid score                                 |                                         |                                          |                                         |                                          |
| 0                                                       | 1.16 (1.14-1.19)                        | 1.14 (1.12-1.16)                         | 0.65 (0.64-0.66)                        | 0.70 (0.69-0.71)                         |
| 1                                                       | 1.15 (1.10-1.19)                        | 1.11 (1.08-1.15)                         | 0.60 (0.59-0.61)                        | 0.65 (0.63-0.66)                         |
| 2                                                       | 1.13 (1.08-1.18)                        | 1.08 (1.04-1.13)                         | 0.59 (0.57-0.61)                        | 0.62 (0.60-0.64)                         |
| 3                                                       | 1.14 (1.08-1.21)                        | 1.10 (1.05-1.16)                         | 0.59 (0.56-0.61)                        | 0.63 (0.61-0.66)                         |
| 4+                                                      | 1.10 (1.05-1.15)                        | 1.10 (1.06-1.14)                         | 0.59 (0.57-0.61)                        | 0.62 (0.60-0.64)                         |
| Discharged against medical advice                       | 1.05 (0.96-1.16)                        | 1.08 (0.99-1.18)                         | 0.60 (0.55-0.66)                        | 0.68 (0.62-0.74)                         |
| Discharged home with support services, n (%)            | 1.14 (1.10-1.18)                        | 1.10 (1.07-1.13)                         | 0.65 (0.63-0.66)                        | 0.67 (0.65-0.69)                         |
| Outpatient visits with all physicians in previous year, |                                         |                                          |                                         |                                          |
| 0-5                                                     | 1.18 (1.15-1.21)                        | 1.15 (1.12-1.18)                         | 0.67 (0.66-0.68)                        | 0.72 (0.71-0.74)                         |
| 6-10                                                    | 1.15 (1.12-1.19)                        | 1.14 (1.11-1.17)                         | 0.62 (0.61-0.64)                        | 0.66 (0.65-0.68)                         |
| 11-15                                                   | 1.12 (1.08-1.16)                        | 1.10 (1.07-1.14)                         | 0.60 (0.58-0.61)                        | 0.64 (0.62-0.65)                         |
| >15                                                     | 1.12 (1.08-1.15)                        | 1.09 (1.06-1.12)                         | 0.58 (0.57-0.59)                        | 0.59 (0.58-0.61)                         |
| No assigned primary care provider                       | 1.18 (1.10-1.27)                        | 1.14 (1.06-1.21)                         | 0.69 (0.66-0.73)                        | 0.76 (0.72-0.79)                         |

Appendix Table 4 (continued). Secondary outcomes unadjusted odds ratios stratified by baseline patient and hospital characteristics.

| <b>Patient Group</b>                                                                    | <b>7-day death or readmission, OR (95% CI)</b> | <b>14-day death or readmission, OR (95% CI)</b> | <b>7-day outpatient follow-up, OR (95% CI)</b> | <b>14-day outpatient follow-up, OR (95% CI)</b> |
|-----------------------------------------------------------------------------------------|------------------------------------------------|-------------------------------------------------|------------------------------------------------|-------------------------------------------------|
| ER visit in previous 6 months                                                           |                                                |                                                 |                                                |                                                 |
| 0                                                                                       | 1.19 (1.16-1.22)                               | 1.17 (1.14-1.20)                                | 0.63 (0.62-0.64)                               | 0.69 (0.68-0.70)                                |
| 1                                                                                       | 1.12 (1.09-1.16)                               | 1.09 (1.06-1.12)                                | 0.63 (0.62-0.64)                               | 0.67 (0.66-0.69)                                |
| 2+                                                                                      | 1.12 (1.10-1.15)                               | 1.11 (1.08-1.13)                                | 0.60 (0.59-0.61)                               | 0.64 (0.63-0.66)                                |
| At least one urgent hospitalisation in previous year                                    | 1.09 (1.06-1.12)                               | 1.08 (1.05-1.10)                                | 0.60 (0.58-0.61)                               | 0.63 (0.62-0.65)                                |
| At least one elective hospitalisation in previous year                                  | 1.16 (1.10-1.22)                               | 1.16 (1.11-1.21)                                | 0.60 (0.58-0.62)                               | 0.62 (0.60-0.65)                                |
| At least one home care visits in previous 6 months                                      | 1.11 (1.05-1.17)                               | 1.10 (1.05-1.15)                                | 0.64 (0.61-0.66)                               | 0.68 (0.65-0.70)                                |
| <b>Hospital type</b>                                                                    |                                                |                                                 |                                                |                                                 |
| Teaching                                                                                | 1.14 (1.10-1.17)                               | 1.11 (1.08-1.14)                                | 0.60 (0.59-0.62)                               | 0.65 (0.63-0.66)                                |
| Community                                                                               | 1.15 (1.13-1.17)                               | 1.13 (1.11-1.14)                                | 0.63 (0.62-0.64)                               | 0.68 (0.67-0.69)                                |
| Small                                                                                   | 1.18 (1.11-1.27)                               | 1.19 (1.12-1.26)                                | 0.59 (0.56-0.62)                               | 0.65 (0.62-0.69)                                |
| Pediatric                                                                               | 1.14 (1.03-1.25)                               | 1.04 (0.96-1.13)                                | 0.65 (0.62-0.70)                               | 0.70 (0.66-0.74)                                |
| Rural                                                                                   | 1.23 (1.17-1.30)                               | 1.20 (1.14-1.25)                                | 0.63 (0.60-0.65)                               | 0.66 (0.64-0.69)                                |
| <b>Diagnostic category of most responsible diagnosis</b>                                |                                                |                                                 |                                                |                                                 |
| Diseases of the circulatory system                                                      | 1.17 (1.13-1.21)                               | 1.14 (1.10-1.18)                                | 0.60 (0.58-0.61)                               | 0.64 (0.62-0.66)                                |
| Diseases of the digestive system                                                        | 1.14 (1.10-1.19)                               | 1.11 (1.07-1.15)                                | 0.62 (0.60-0.63)                               | 0.65 (0.63-0.66)                                |
| Diseases of the respiratory system                                                      | 1.13 (1.08-1.18)                               | 1.07 (1.03-1.11)                                | 0.62 (0.61-0.64)                               | 0.68 (0.66-0.70)                                |
| Symptoms, signs and abnormal clinical and laboratory findings, not elsewhere classified | 1.14 (1.09-1.20)                               | 1.14 (1.09-1.19)                                | 0.60 (0.58-0.62)                               | 0.66 (0.63-0.68)                                |
| Injury, poisoning and certain other consequences of external causes                     | 1.20 (1.14-1.26)                               | 1.19 (1.14-1.24)                                | 0.62 (0.60-0.64)                               | 0.69 (0.67-0.71)                                |
| Diseases of the genitourinary system                                                    | 1.20 (1.12-1.28)                               | 1.21 (1.14-1.28)                                | 0.63 (0.61-0.67)                               | 0.69 (0.66-0.73)                                |
| Mental and behavioural disorders                                                        | 1.11 (1.03-1.19)                               | 1.07 (1.00-1.14)                                | 0.62 (0.59-0.65)                               | 0.68 (0.65-0.71)                                |
| Neoplasms                                                                               | 1.14 (1.06-1.22)                               | 1.14 (1.08-1.22)                                | 0.60 (0.56-0.63)                               | 0.60 (0.56-0.63)                                |
| Pregnancy, childbirth and the puerperium                                                | 1.19 (1.10-1.29)                               | 1.17 (1.09-1.26)                                | 0.75 (0.70-0.80)                               | 0.80 (0.74-0.85)                                |
| Endocrine, nutritional and metabolic diseases                                           | 1.11 (1.01-1.21)                               | 1.05 (0.97-1.14)                                | 0.61 (0.58-0.65)                               | 0.65 (0.61-0.69)                                |

Appendix Table 5. Balance diagnostics for propensity score matched sample. SD=standardized difference of means.

| Characteristic                                 | Holiday<br>n= 217,303* | Control<br>n= 217,303 | SD   |
|------------------------------------------------|------------------------|-----------------------|------|
| Year of discharge from hospital, n(%)          |                        |                       |      |
| 2002                                           | 17,485 (8.0%)          | 17,550 (8.1%)         | 0.00 |
| 2003                                           | 18,329 (8.4%)          | 17,624 (8.1%)         | 0.01 |
| 2004                                           | 17,324 (8.0%)          | 17,046 (7.8%)         | 0.00 |
| 2005                                           | 15,327 (7.1%)          | 15,926 (7.3%)         | 0.01 |
| 2006                                           | 15,004 (6.9%)          | 14,940 (6.9%)         | 0.00 |
| 2007                                           | 14,349 (6.6%)          | 14,719 (6.8%)         | 0.01 |
| 2008                                           | 14,052 (6.5%)          | 14,199 (6.5%)         | 0.00 |
| 2009                                           | 14,265 (6.6%)          | 14,535 (6.7%)         | 0.00 |
| 2010                                           | 14,724 (6.8%)          | 14,405 (6.6%)         | 0.01 |
| 2011                                           | 14,417 (6.6%)          | 15,004 (6.9%)         | 0.01 |
| 2012                                           | 15,509 (7.1%)          | 15,343 (7.1%)         | 0.00 |
| 2013                                           | 15,498 (7.1%)          | 15,207 (7.0%)         | 0.01 |
| 2014                                           | 15,896 (7.3%)          | 15,404 (7.1%)         | 0.01 |
| 2015                                           | 15,124 (7.0%)          | 15,401 (7.1%)         | 0.00 |
| Patient age (years), n (%)                     |                        |                       |      |
| <18 years                                      | 30,195 (13.9%)         | 29,912 (13.8%)        | 0.00 |
| 18-64 years                                    | 96,895 (44.6%)         | 98,214 (45.2%)        | 0.01 |
| 65+ years                                      | 90,213 (41.5%)         | 89,177 (41.0%)        | 0.01 |
| Sex female, n (%)                              | 107,466 (49.5%)        | 107,132 (49.3%)       | 0.00 |
| Rural, n (%)                                   | 32,016 (14.7%)         | 31,306 (14.4%)        | 0.01 |
| Length of hospital stay (days), median (IQR)   | 3 (2-6)                | 3 (2-6)               | 0.03 |
| Arrival by ambulance at index admission, n (%) | 71,035 (32.7%)         | 70,825 (32.6%)        | 0.00 |
| Charlson comorbidity score, n (%)              |                        |                       |      |
| 0                                              | 113,977 (52.5%)        | 114,918 (52.9%)       | 0.01 |
| 1                                              | 43,411 (20.0%)         | 43,420 (20.0%)        | 0.00 |
| 2                                              | 24,728 (11.4%)         | 24,336 (11.2%)        | 0.01 |
| 3                                              | 14,198 (6.5%)          | 13,955 (6.4%)         | 0.00 |
| 4+                                             | 20,989 (9.7%)          | 20,674 (9.5%)         | 0.00 |
| Income quintile, n (%)                         |                        |                       |      |
| 1                                              | 1,117 (0.5%)           | 1,071 (0.5%)          | 0.00 |
| 2                                              | 49,491 (22.8%)         | 49,365 (22.7%)        | 0.00 |
| 3                                              | 45,451 (20.9%)         | 45,611 (21.0%)        | 0.00 |
| 4                                              | 42,039 (19.3%)         | 42,059 (19.4%)        | 0.00 |
| 5                                              | 41,637 (19.2%)         | 41,712 (19.2%)        | 0.00 |
| 5                                              | 37,568 (17.3%)         | 37,485 (17.3%)        | 0.00 |
| Discharged against medical advice, n (%)       | 3,025 (1.4%)           | 2,998 (1.4%)          | 0.00 |
| Discharged with support services, n (%)        | 34,783 (16.0%)         | 34,106 (15.7%)        | 0.01 |

Appendix Table 5 (continued). Balance diagnostics for propensity score matched sample.  
SD=standardized difference of means.

| Characteristic                                                                          | Holiday<br>n= 217,303* | Control<br>n= 217,303 | SD   |
|-----------------------------------------------------------------------------------------|------------------------|-----------------------|------|
| ER visits in previous 6 months, n (%)                                                   | 90,716 (41.7%)         | 92,312 (42.5%)        | 0.01 |
| 0                                                                                       | 64,673 (29.8%)         | 63,584 (29.3%)        | 0.01 |
| 1                                                                                       | 61,914 (28.5%)         | 61,407 (28.3%)        | 0.01 |
| 2+                                                                                      |                        |                       |      |
| At least one urgent hospitalisation in previous year, n (%)                             | 51,105 (23.5%)         | 50,055 (23.0%)        | 0.01 |
| At least one elective hospitalisation in previous year, n (%)                           | 18,292 (8.4%)          | 18,056 (8.3%)         | 0.00 |
| At least one home care visits in previous six months, n (%)                             | 16,077 (7.4%)          | 15,741 (7.2%)         | 0.01 |
| Outpatient visits with all physicians in previous year, n (%)                           | 73,247 (33.7%)         | 74,065 (34.1%)        | 0.01 |
| 0-5                                                                                     | 52,312 (24.1%)         | 52,418 (24.1%)        | 0.00 |
| 6-10                                                                                    | 36,623 (16.9%)         | 36,336 (16.7%)        | 0.00 |
| 11-15                                                                                   | 55,121 (25.4%)         | 54,484 (25.1%)        | 0.01 |
| >15                                                                                     |                        |                       |      |
| Assigned primary care provider, n (%)                                                   | 207,159 (95.3%)        | 207,007 (95.3%)       | 0.00 |
| Hospital type, n (%)                                                                    |                        |                       |      |
| Teaching                                                                                | 54,480 (25.1%)         | 53,943 (24.8%)        | 0.01 |
| Community                                                                               | 144,600 (66.5%)        | 145,640 (67.0%)       | 0.01 |
| Small                                                                                   | 8,803 (4.1%)           | 8,523 (3.9%)          | 0.01 |
| Pediatric                                                                               | 6,220 (2.9%)           | 6,065 (2.8%)          | 0.00 |
| Rural                                                                                   | 14,219 (6.5%)          | 13,880 (6.4%)         | 0.01 |
| <b>Diagnostic category for most responsible diagnosis, n (%)</b>                        |                        |                       |      |
| Diseases of the circulatory system                                                      | 35,757 (16.5%)         | 36,321 (16.7%)        | 0.01 |
| Diseases of the digestive system                                                        | 33,963 (15.6%)         | 34,788 (16.0%)        | 0.01 |
| Diseases of the respiratory system                                                      | 33,694 (15.5%)         | 30,784 (14.2%)        | 0.04 |
| Symptoms, signs and abnormal clinical and laboratory findings, not elsewhere classified | 21,041 (9.7%)          | 21,736 (10.0%)        | 0.01 |
| Injury, poisoning and certain other consequences of external causes                     | 22,049 (10.1%)         | 21,018 (9.7%)         | 0.02 |
| Diseases of the genitourinary system                                                    | 10,416 (4.8%)          | 10,611 (4.9%)         | 0.00 |
| Mental and behavioral disorders                                                         | 8,630 (4.0%)           | 9,930 (4.6%)          | 0.03 |
| Neoplasms                                                                               | 7,032 (3.2%)           | 7,352 (3.4%)          | 0.01 |
| Pregnancy, childbirth and the puerperium                                                | 6,090 (2.8%)           | 6,381 (2.9%)          | 0.01 |
| Endocrine, nutritional and metabolic diseases                                           | 6,753 (3.1%)           | 6,727 (3.1%)          | 0.00 |

Appendix Table 5 (continued). Balance diagnostics for propensity score matched sample.  
SD=standardized difference of means.

| <b>Characteristic</b>                                                               | <b>Holiday</b><br>n= 217,303* | <b>Control</b><br>n= 217,303 | <b>SD</b> |
|-------------------------------------------------------------------------------------|-------------------------------|------------------------------|-----------|
| <b>Admission Diagnosis (ICD-10 code), n (%)</b>                                     |                               |                              |           |
| Pneumonia, unspecified (J189)                                                       | 7,289 (3.4%)                  | 7,586 (3.5%)                 | 0.01      |
| Congestive Heart Failure (I500)                                                     | 5,869 (2.7%)                  | 5,809 (2.7%)                 | 0.00      |
| Chronic Obstructive Pulmonary Disease with acute exacerbation, unspecified (J441)   | 4,845 (2.2%)                  | 4,906 (2.3%)                 | 0.00      |
| Chronic obstructive pulmonary disease with acute lower respiratory infection (J440) | 3,512 (1.6%)                  | 3,523 (1.6%)                 | 0.00      |
| Chest pain, unspecified (R074)                                                      | 3,325 (1.5%)                  | 3,195 (1.5%)                 | 0.00      |
| Urinary tract infection, site not specified (N390)                                  | 3,067 (1.4%)                  | 2,988 (1.4%)                 | 0.00      |
| Atherosclerotic heart disease (I251)                                                | 2,783 (1.3%)                  | 2,822 (1.3%)                 | 0.00      |
| Unstable angina (I200)                                                              | 2,515 (1.2%)                  | 2,385 (1.1%)                 | 0.01      |
| Syncope and collapse (R55)                                                          | 2,484 (1.1%)                  | 2,439 (1.1%)                 | 0.00      |
| Convalescence following surgery (Z540)                                              | 1,849 (0.9%)                  | 2,032 (0.9%)                 | 0.01      |

\* Overall 217,303 cases matched, 2 cases unmatched (over 99.9% matched).



Appendix Table 6. Unadjusted and adjusted outcomes of adult patients with a diagnosis of congestive heart failure discharged from hospital during holiday and control periods.

| CHF                               | Holiday, n (%) | Control, n (%) | Unadjusted OR (95% CI) | Adjusted OR (95% CI) |
|-----------------------------------|----------------|----------------|------------------------|----------------------|
| <b>Primary Outcome</b>            |                |                |                        |                      |
| 30-day death or readmission       | 1,986 (31.9)   | 4,128 (30.9)   | 1.04 (0.98-1.11)       | 1.06 (1.01-1.12)     |
| 30-day emergency department visit | 1,902 (30.5)   | 3,874 (29.0)   | 1.07 (1.01-1.15)       | 1.09 (1.03-1.16)     |
| 30-day urgent re-hospitalisation  | 1,251(20.1)    | 2,612 (19.6)   | 1.03 (0.96-1.11)       | 1.05 (0.98-1.12)     |
| 30-day death                      | 231 (3.7)      | 496 (3.7)      | 1.00 (0.85-1.17)       | 1.02 (0.88-1.19)     |
| <b>Secondary Outcomes</b>         |                |                |                        |                      |
| 7-day outpatient follow-up        | 2,274 (36.5)   | 6,761 (50.6)   | 0.56 (0.53-0.60)       | 0.55 (0.51-0.58)     |
| 14-day outpatient follow-up       | 3,786 (60.7)   | 9,636 (72.2)   | 0.60 (0.56-0.64)       | 0.58 (0.54-0.61)     |
| 7-day death or readmission        | 804 (12.9)     | 1,547 (11.6)   | 1.13 (1.03-1.24)       | 1.14 (1.05-1.24)     |
| 7-day emergency department visit  | 774 (12.4)     | 1,450 (10.9)   | 1.16 (1.06-1.28)       | 1.18 (1.08-1.28)     |
| 7-day urgent re-hospitalisation   | 422 (6.8)      | 849 (6.4)      | 1.07 (0.95-1.21)       | 1.08 (0.96-1.11)     |
| 7-day death                       | 49 (0.8)       | 112 (0.8)      | 0.94 (0.67-1.31)       | 0.96 (0.67-1.37)     |
| 14-day death or readmission       | 1,281 (20.6)   | 2,586 (19.4)   | 1.08 (1.00-1.16)       | 1.04 (1.01-1.18)     |
| 14-day emergency department visit | 1,233 (19.8)   | 2,422 (18.1)   | 1.11 (1.03-1.20)       | 1.13 (1.05-1.22)     |
| 14-day urgent re-hospitalisation  | 748 (12.0)     | 1,524 (11.4)   | 1.06 (0.96-1.16)       | 1.08 (0.98-1.18)     |
| 14-day death                      | 96 (1.5)       | 221 (1.7)      | 0.93 (0.73-1.18)       | 0.96 (0.75-1.23)     |

Appendix Table 7. Unadjusted and adjusted outcomes of adult patients with a diagnosis of chronic obstructive pulmonary disease discharged from hospital during holiday and control periods.

| COPD                              | Holiday, n (%) | Control, n (%) | Unadjusted OR (95% CI) | Adjusted OR (95% CI) |
|-----------------------------------|----------------|----------------|------------------------|----------------------|
| <b>Primary Outcome</b>            |                |                |                        |                      |
| 30-day death or readmission       | 2,360 (26.4)   | 4,064 (27.8)   | 0.94 (0.88-0.99)       | 0.99 (0.93-1.05)     |
| 30-day emergency department visit | 2,293 (25.7)   | 3,915 (26.8)   | 0.95 (0.89-1.01)       | 1.00 (0.94-1.06)     |
| 30-day urgent re-hospitalisation  | 1,384 (15.5)   | 2,396 (16.4)   | 0.94 (0.87-1.01)       | 1.00 (0.94-1.08)     |
| 30-day death                      | 198 (2.2)      | 405 (2.8)      | 0.80 (0.67-0.95)       | 0.90 (0.76-1.07)     |
| <b>Secondary Outcomes</b>         |                |                |                        |                      |
| 7-day outpatient follow-up        | 2,669 (29.9)   | 6,030 (41.2)   | 0.61 (0.58-0.64)       | 0.59 (0.55-0.63)     |
| 14-day outpatient follow-up       | 4,875 (54.6)   | 9,383 (64.1)   | 0.67 (0.64-0.71)       | 0.64 (0.60-0.68)     |
| 7-day death or readmission        | 977 (10.9)     | 1,422 (9.7)    | 1.14 (1.05-1.24)       | 1.19 (1.09-1.30)     |
| 7-day emergency department visit  | 949 (10.6)     | 1,364 (9.3)    | 1.16 (1.06-1.26)       | 1.20 (1.10-1.31)     |
| 7-day urgent re-hospitalisation   | 480 (5.5)      | 744 (5.1)      | 1.08 (0.96-1.22)       | 1.15 (1.03-1.28)     |
| 7-day death                       | 53 (0.6)       | 73 (0.5)       | 1.19 (0.84-1.70)       | 1.39 (0.98-1.97)     |
| 14-day death or readmission       | 1,564 (17.5)   | 2,420 (16.5)   | 1.07 (1.00-1.15)       | 1.13 (1.05-1.21)     |
| 14-day emergency department visit | 1,523 (17.1)   | 2,321 (15.9)   | 1.09 (1.02-1.17)       | 1.14 (1.06-1.22)     |
| 14-day urgent re-hospitalisation  | 845 (9.5)      | 1,336 (9.1)    | 1.04 (0.95-1.14)       | 1.11 (1.01-1.22)     |
| 14-day death                      | 102 (1.1)      | 182 (1.2)      | 0.92 (0.72-1.17)       | 1.05 (0.85-1.30)     |

Appendix Table 8. Adjusted results for outcomes of patients at high and low baseline risk of readmission (as predicted by LACE score) discharged from hospital during holiday and control periods.

| <b>Outcome Measure</b>            | <b>High Risk Group<br/>Adjusted OR (95%<br/>CI)</b> | <b>Low Risk Group<br/>Adjusted OR (95%<br/>CI)</b> | <b>P for<br/>interaction</b> |
|-----------------------------------|-----------------------------------------------------|----------------------------------------------------|------------------------------|
| <b>Primary Outcome</b>            |                                                     |                                                    |                              |
| 30-day death or readmission       | 1.06 (1.04-1.09)                                    | 1.12 (1.10-1.13)                                   | 0.0001                       |
| 30-day emergency department visit | 1.07 (1.05-1.09)                                    | 1.11 (1.09-1.13)                                   | 0.002                        |
| 30-day urgent re-hospitalisation  | 1.05 (1.03-1.08)                                    | 1.08 (1.06-1.11)                                   | 0.08                         |
| 30-day death                      | 1.02 (0.98-1.07)                                    | 1.17 (1.10-1.25)                                   | 0.001                        |
| <b>Secondary Outcomes</b>         |                                                     |                                                    |                              |
| 7-day outpatient follow-up        | 0.58 (0.56-0.59)                                    | 0.62 (0.61-0.63)                                   | <0.0001                      |
| 14-day outpatient follow-up       | 0.60 (0.59-0.62)                                    | 0.67 (0.66-0.68)                                   | <0.0001                      |
| 7-day death or readmission        | 1.14 (1.11-1.17)                                    | 1.16 (1.14-1.19)                                   | 0.25                         |
| 7-day emergency department visit  | 1.16 (1.13-1.19)                                    | 1.17 (1.14-1.20)                                   | 0.57                         |
| 7-day urgent re-hospitalisation   | 1.06 (1.03-1.09)                                    | 1.08 (1.04-1.12)                                   | 0.45                         |
| 7-day death                       | 1.07 (0.96-1.18)                                    | 1.36 (1.14-1.63)                                   | 0.02                         |
| 14-day death or readmission       | 1.11 (1.08-1.13)                                    | 1.13 (1.13-1.17)                                   | 0.003                        |
| 14-day emergency department visit | 1.13 (1.10-1.15)                                    | 1.16 (1.14-1.18)                                   | 0.02                         |
| 14-day urgent re-hospitalisation  | 1.06 (1.03-1.09)                                    | 1.09 (1.06-1.12)                                   | 0.17                         |
| 14-day death                      | 1.03 (0.97-1.10)                                    | 1.25 (1.11-1.40)                                   | 0.008                        |

Appendix Table 9. Adjusted results for outcomes of patients discharged from hospital during holiday and control periods, according to year of hospital discharge.

| <b>Outcome Measure</b>            | <b>Year of Discharge<br/>2002-2008<br/>Adjusted OR (95%<br/>CI)</b> | <b>Year of Discharge<br/>2009-2015<br/>Adjusted OR (95%<br/>CI)</b> | <b>P for<br/>interaction</b> |
|-----------------------------------|---------------------------------------------------------------------|---------------------------------------------------------------------|------------------------------|
| <b>Primary Outcome</b>            |                                                                     |                                                                     |                              |
| 30-day death or readmission       | 1.10 (1.08-1.12)                                                    | 1.08 (1.06-1.09)                                                    | 0.09                         |
| 30-day emergency department visit | 1.10 (1.07-1.12)                                                    | 1.08 (1.06-1.10)                                                    | 0.23                         |
| 30-day urgent re-hospitalisation  | 1.07 (1.04-1.09)                                                    | 1.05 (1.03-1.07)                                                    | 0.24                         |
| 30-day death                      | 1.07 (1.01-1.13)                                                    | 1.05 (1.00-1.10)                                                    | 0.62                         |
| <b>Secondary Outcomes</b>         |                                                                     |                                                                     |                              |
| 7-day outpatient follow-up        | 0.62 (0.61-0.63)                                                    | 0.60 (0.59-0.61)                                                    | 0.02                         |
| 14-day outpatient follow-up       | 0.67 (0.66-0.68)                                                    | 0.63 (0.62-0.65)                                                    | <0.0001                      |
| 7-day death or readmission        | 1.18 (1.15-1.20)                                                    | 1.13 (1.11-1.16)                                                    | 0.008                        |
| 7-day emergency department visit  | 1.19 (1.17-1.22)                                                    | 1.14 (1.12-1.17)                                                    | 0.007                        |
| 7-day urgent re-hospitalisation   | 1.08 (1.04-1.11)                                                    | 1.05 (1.02-1.08)                                                    | 0.30                         |
| 7-day death                       | 1.17 (1.03-1.32)                                                    | 1.11 (0.96-1.28)                                                    | 0.62                         |
| 14-day death or readmission       | 1.15 (1.12-1.17)                                                    | 1.12 (1.10-1.14)                                                    | 0.09                         |
| 14-day emergency department visit | 1.16 (1.14-1.19)                                                    | 1.13 (1.11-1.15)                                                    | 0.07                         |
| 14-day urgent re-hospitalisation  | 1.07 (1.05-1.10)                                                    | 1.07 (1.04-1.09)                                                    | 0.67                         |
| 14-day death                      | 1.09 (1.01-1.17)                                                    | 1.07 (0.99-1.16)                                                    | 0.79                         |

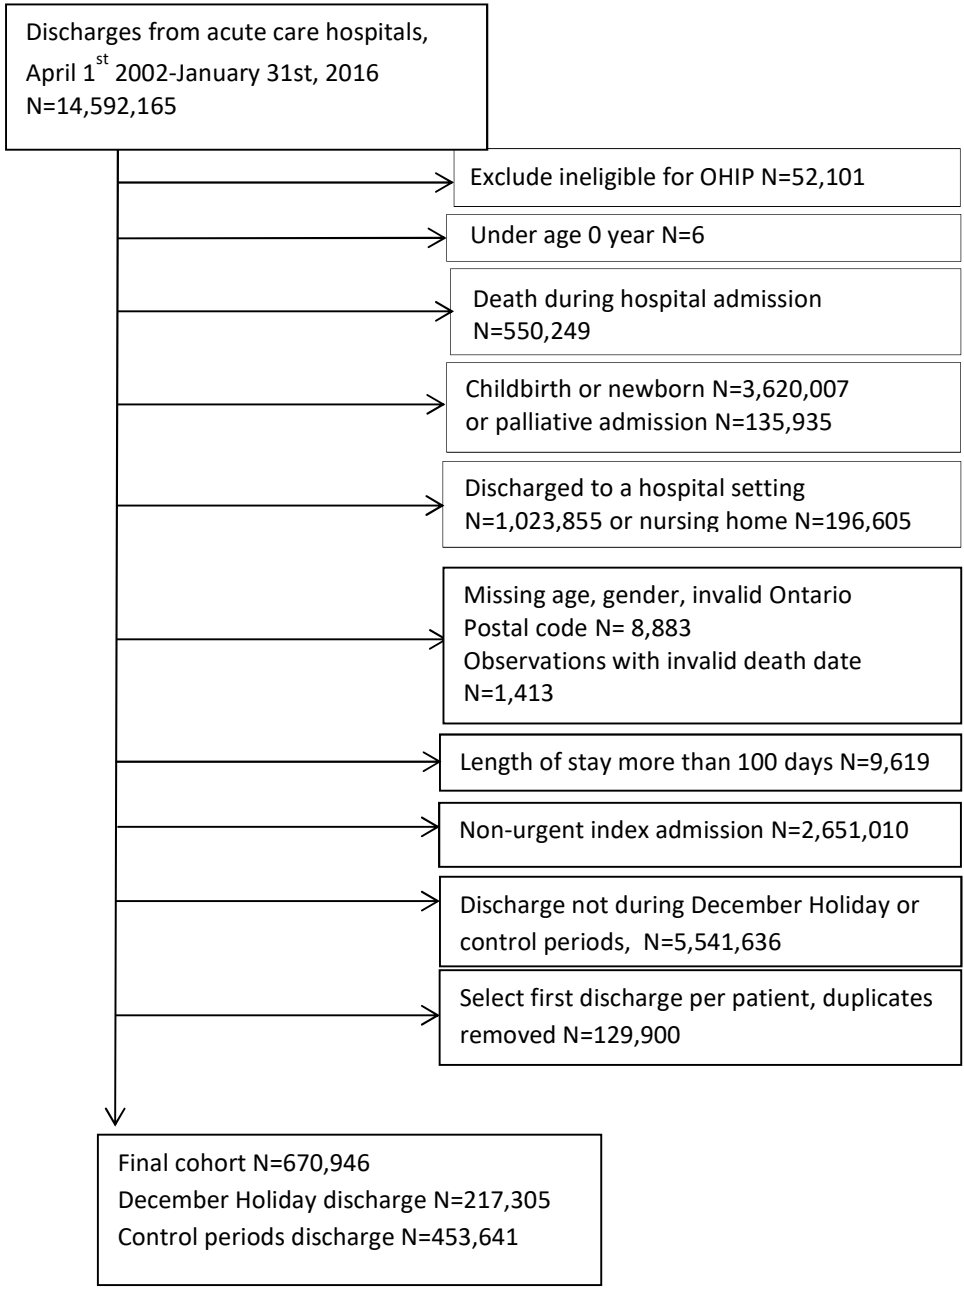

Appendix Figure 1: Flow chart detailing exclusions for study population. OHIP= Ontario Health Insurance Plan.

Appendix Figure 2. Forest plot of unadjusted results for 30 day death or readmission after hospital discharge during the Christmas holiday period or two controls periods, stratified by baseline patient and hospital characteristics.

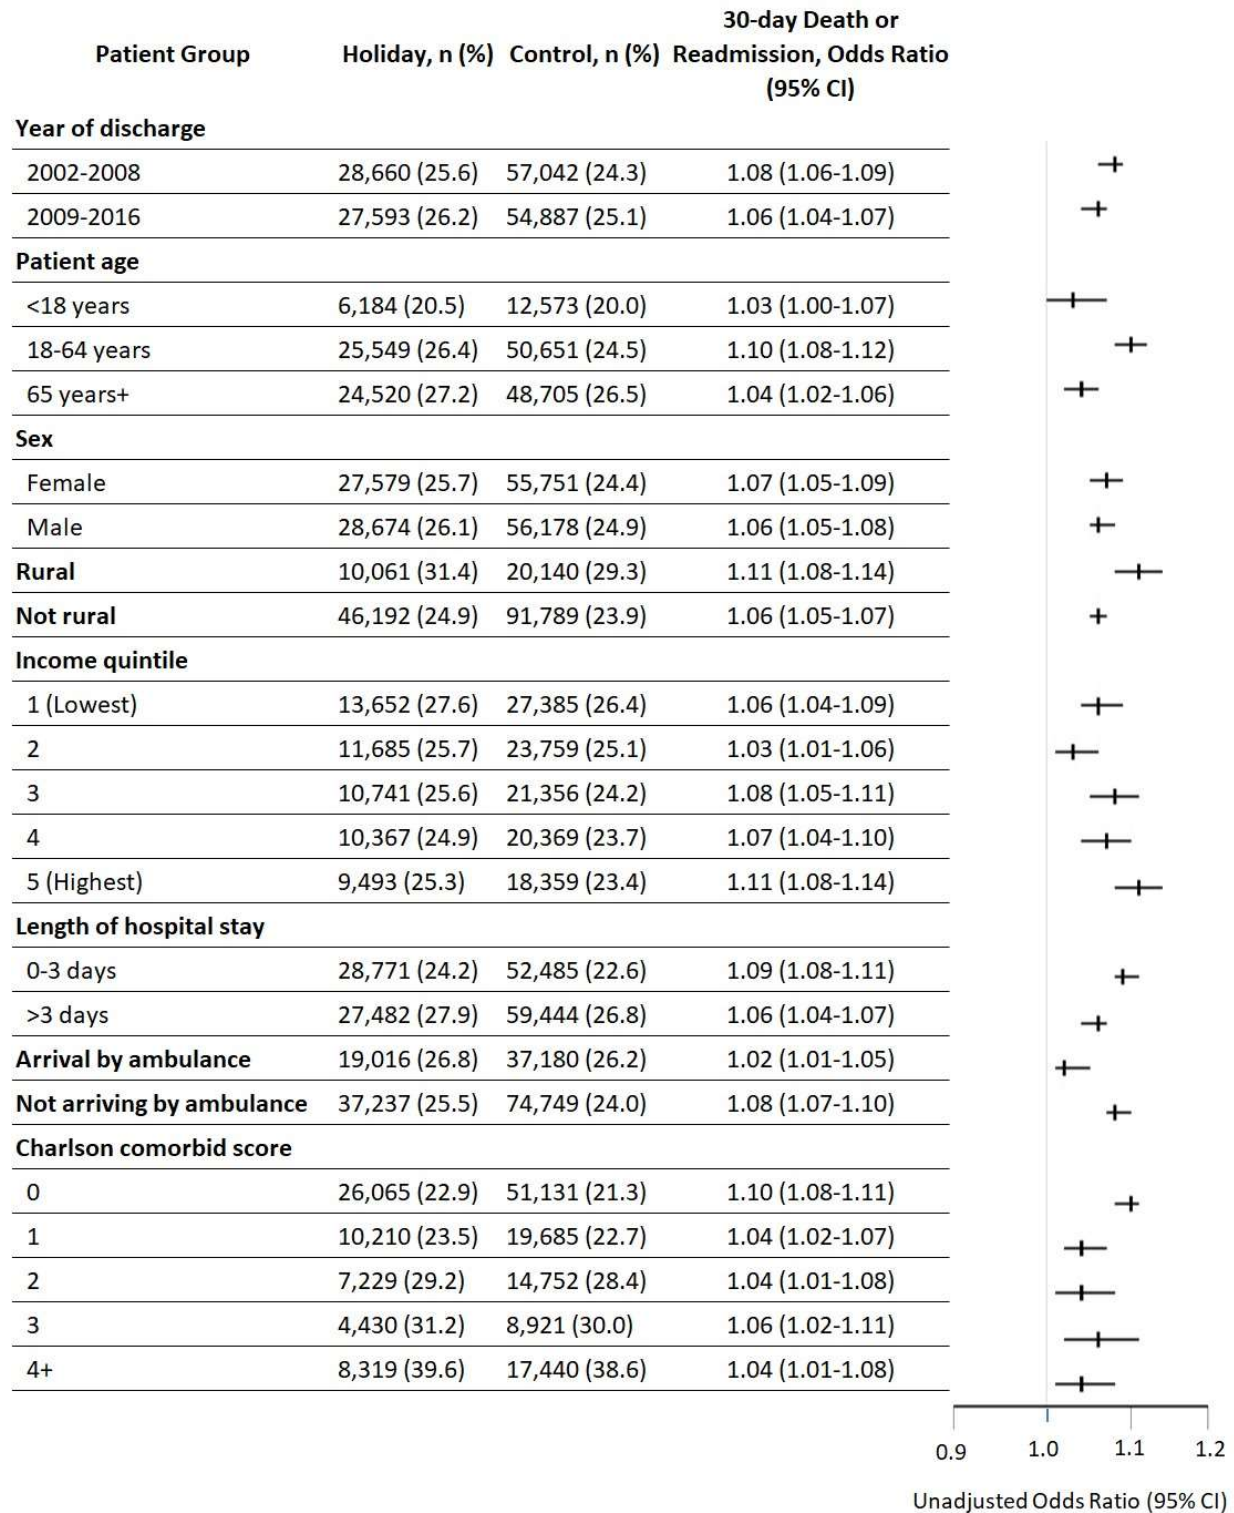

Appendix Figure 2 (continued). Forest plot of unadjusted results for 30 day death or readmission after hospital discharge during the Christmas holiday period or two controls periods, stratified by baseline patient and hospital characteristics.

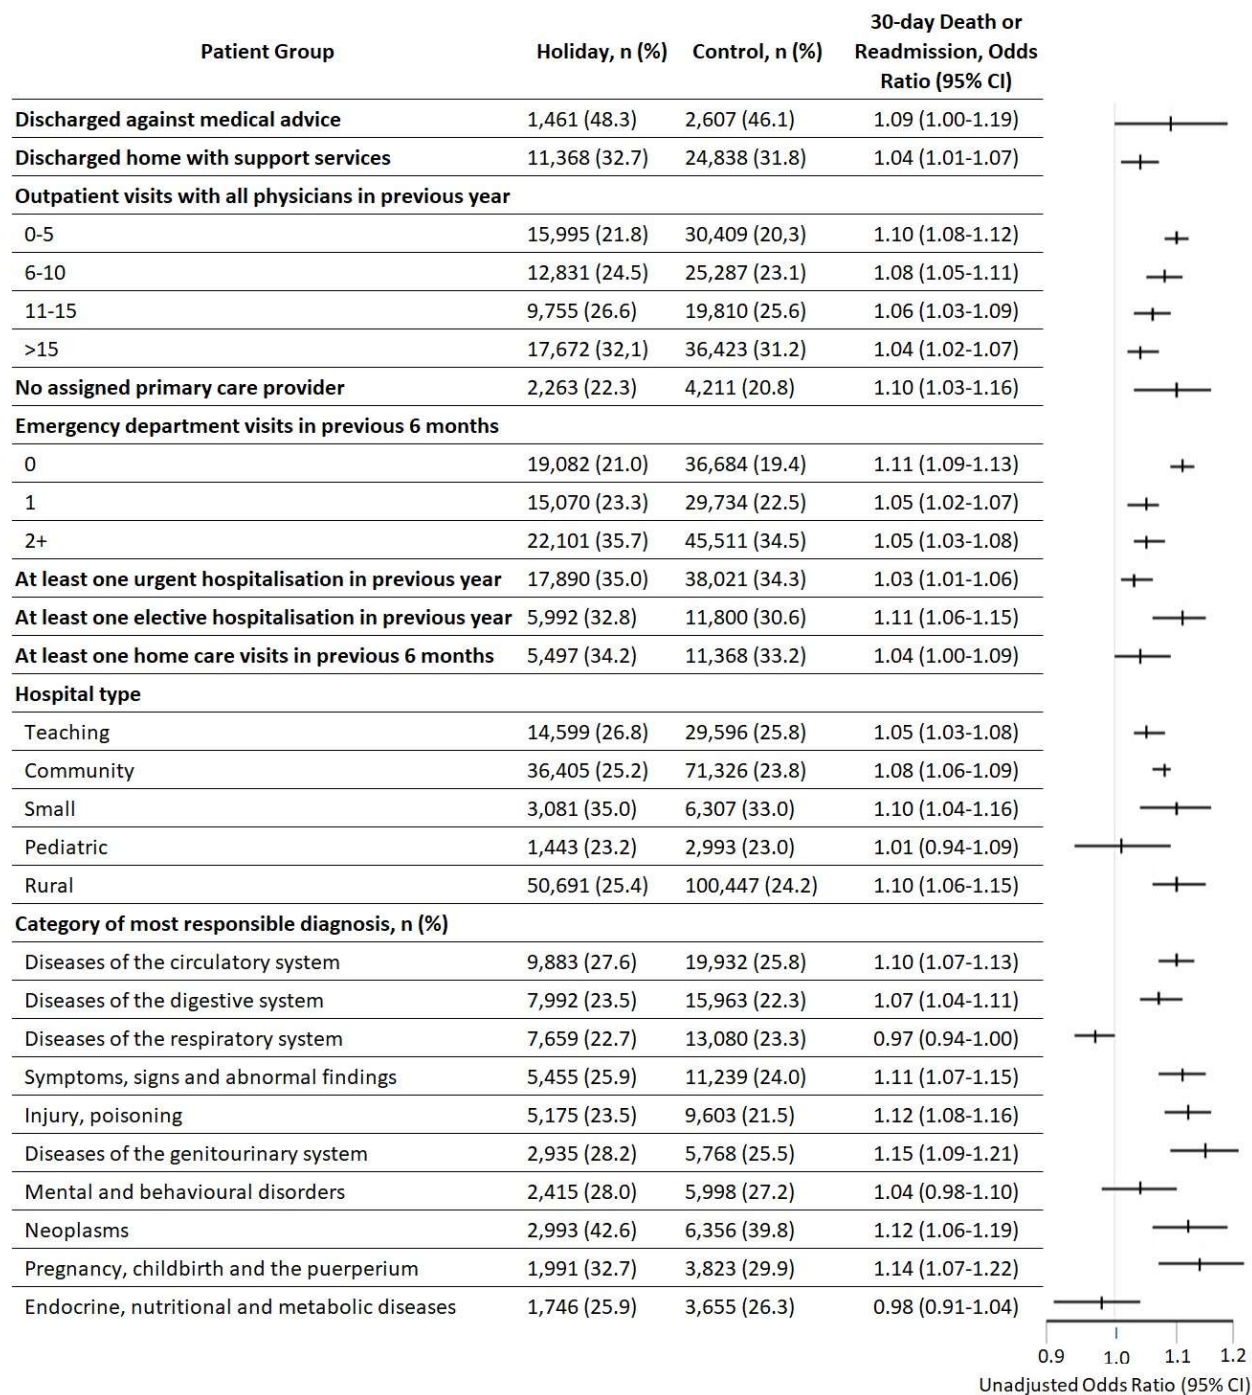

Appendix Figure 3. Unadjusted proportion of patients with 7-day death, emergency department visit or urgent re-hospitalisation, by day of discharge, relative to Christmas day. Results from all years are combined.

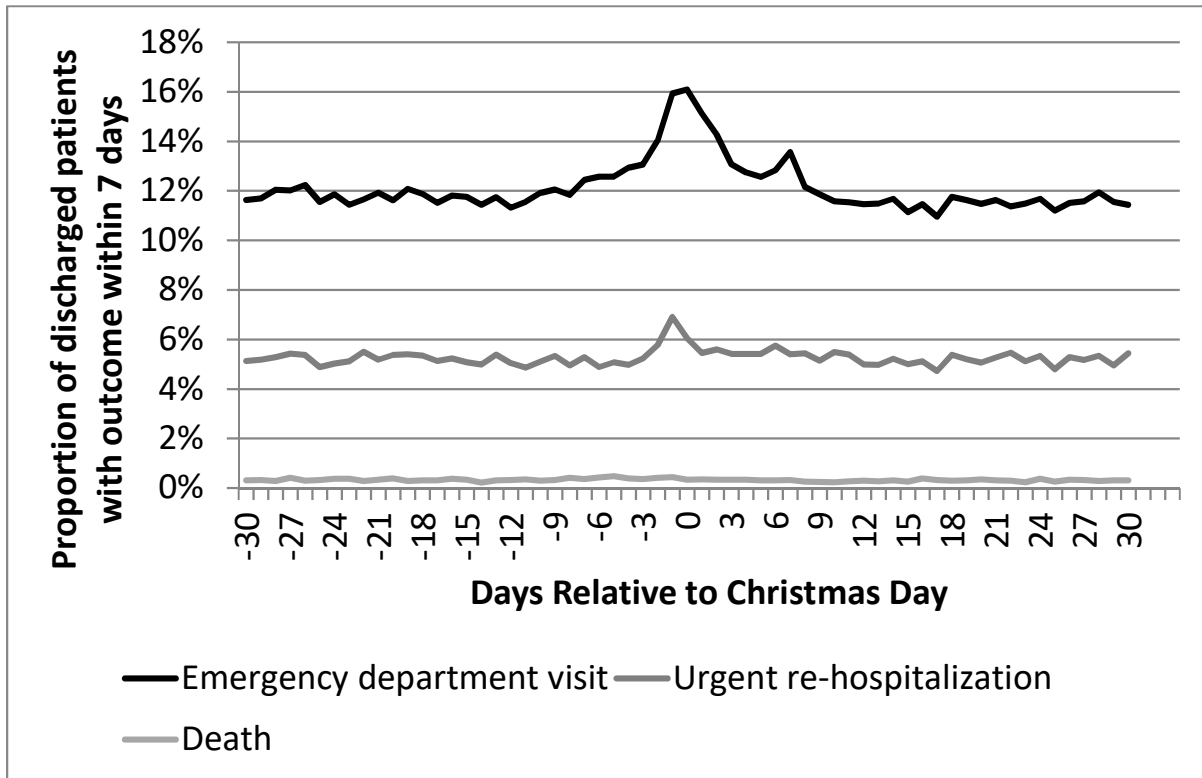

Supplement: lapl044561.ww1.pdf [file lapl044561.ww1.pdf]
